# Supplementary material for: First Prospective Cohort Study of Diabetic Retinopathy from Sub-Saharan Africa: High Incidence and Progression of Retinopathy and Relationship to Human Immunodeficiency Virus Infection
Source: PubMed Central journal article supplement (PMC4994575; doi:10.1016/j.ophtha.2016.05.042), 2016-09
Supplement: mmc1.pdf [file mmc1.pdf]

**Online Appendix Table 1** Life tables showing cumulative yearly incidence of progression to higher grades of retinopathy and development of sight threatening diabetic retinopathy and of progression by 2 (or more) and 3 (or more) steps on the LDES scale in the worse eye of subjects in the MDRS 24 month cohort study and **level 20** retinopathy at baseline.

| T | Level 30 |    |         |           | Level 40 |   |         |          | STDR † |   |         |           |
|---|----------|----|---------|-----------|----------|---|---------|----------|--------|---|---------|-----------|
|   | N        | n  | C. Inc. | 95% CI    | N        | n | C. Inc. | 95% CI   | N      | n | C. Inc. | 95% CI    |
| 1 | 94       | 12 | 13.1    | 6.2-20.0  | 94       | 2 | 2.2     | 0-5.2    | 70     | 9 | 13.2    | 5.2-21.3  |
| 2 | 77       | 13 | 27.9    | 18.6-37.2 | 87       | 5 | 7.9     | 2.3-13.6 | 57     | 9 | 27.3    | 16.4-38.2 |

| T | 2 Step progression |    |         |           | 3 Step progression |   |         |          |  |  |  |  |
|---|--------------------|----|---------|-----------|--------------------|---|---------|----------|--|--|--|--|
|   | N                  | n  | C. Inc. | 95% CI    | N                  | n | C. Inc. | 95% CI   |  |  |  |  |
| 1 | 94                 | 6  | 6.5     | 1.5-11.6  | 94                 | 2 | 2.2     | 0-5.2    |  |  |  |  |
| 2 | 83                 | 12 | 20.3    | 11.9-28.7 | 87                 | 7 | 10.2    | 3.9-16.5 |  |  |  |  |

T = time from recruitment (years); N = number entering time interval; n = new cases diagnosed during year; C. inc. = cumulative incidence (%); CI = confidence interval; STDR = sight threatening diabetic retinopathy. † - patients with STDR at baseline omitted from analysis
