# Supplementary material for: First Prospective Cohort Study of Diabetic Retinopathy from Sub-Saharan Africa: High Incidence and Progression of Retinopathy and Relationship to Human Immunodeficiency Virus Infection
Source: PubMed Central journal article supplement (PMC4994575; doi:10.1016/j.ophtha.2016.05.042), 2016-09
Supplement: mmc2.pdf [file mmc2.pdf]

**Online Appendix Table 2** Life tables showing cumulative yearly incidence of progression to higher grades of retinopathy and development of sight threatening diabetic retinopathy and of progression by 2 (or more) and 3 (or more) steps on the LDES scale in the worse eye of subjects in the MDRS 24 month cohort study and **level 30** retinopathy at baseline.

| T | Level 40 |   |         |           | Level 50 |   |         |        | Level 60 + |   |         |        |
|---|----------|---|---------|-----------|----------|---|---------|--------|------------|---|---------|--------|
|   | N        | n | C. Inc. | 95% CI    | N        | n | C. Inc. | 95% CI | N          | n | C. Inc. | 95% CI |
| 1 | 25       | 6 | 25.5    | 7.9-43.1  | 25       | 0 | 0       |        | 25         | 0 | 0       |        |
| 2 | 16       | 4 | 44.2    | 23.5-65.0 | 22       | 1 | 4.5     | 0-13.2 | 22         | 2 | 9.1     | 0-21.1 |

| T | STDR ‡ |   |         |        | 2 Step progression |   |         |           | 3 Step progression |   |         |           |
|---|--------|---|---------|--------|--------------------|---|---------|-----------|--------------------|---|---------|-----------|
|   | N      | n | C. Inc. | 95% CI | N                  | n | C. Inc. | 95% CI    | N                  | n | C. Inc. | 95% CI    |
| 1 | 6      | 0 | 0       |        | 25                 | 5 | 21.3    | 4.8-37.9  | 25                 | 1 | 4.3     | 0-12.5    |
| 2 | 4      | 1 | 25.0    | 0-67.4 | 17                 | 3 | 35.2    | 15.2-55.2 | 21                 | 6 | 31.6    | 12.2-51.0 |

T = time from recruitment (years); N = number entering time interval; n = new cases diagnosed during year; C. inc. = cumulative incidence (%); CI = confidence interval; STDR = sight threatening diabetic retinopathy. ‡ - those with STDR at baseline omitted from analysis
