# Supplementary material for: First Prospective Cohort Study of Diabetic Retinopathy from Sub-Saharan Africa: High Incidence and Progression of Retinopathy and Relationship to Human Immunodeficiency Virus Infection
Source: PubMed Central journal article supplement (PMC4994575; doi:10.1016/j.ophtha.2016.05.042), 2016-09
Supplement: mmc3.pdf [file mmc3.pdf]

**Online Appendix Table 3** Life tables showing cumulative yearly incidence of progression to higher grades of retinopathy and of progression by 2 (or more) and 3 (or more) steps on the LDES scale in the worse eye of subjects in the MDRS 24 month cohort study and **level 40** retinopathy at baseline.

|   | Level 50 |   |         |        | Level 60 + |   |         |        |  |  |  |  |
|---|----------|---|---------|--------|------------|---|---------|--------|--|--|--|--|
| T | N        | n | C. Inc. | 95% CI | N          | n | C. Inc. | 95% CI |  |  |  |  |
| 1 | 26       | 1 | 4.0     | 0-11.7 | 26         | 4 | 16      | 2-30   |  |  |  |  |
| 2 | 23       | 2 | 13.1    | 0-27.2 | 20         | 5 | 37      | 18-56  |  |  |  |  |

|   | 2 Step progression |   |         |           | 3 Step progression |   |         |          |  |  |  |  |
|---|--------------------|---|---------|-----------|--------------------|---|---------|----------|--|--|--|--|
| T | N                  | n | C. Inc. | 95% CI    | N                  | n | C. Inc. | 95% CI   |  |  |  |  |
| 1 | 26                 | 4 | 16.0    | 1.6-30.4  | 26                 | 4 | 16.0    | 1.6-30.4 |  |  |  |  |
| 2 | 20                 | 8 | 49.6    | 29.6-69.6 | 20                 | 2 | 24.4    | 7.2-41.6 |  |  |  |  |

T = time from recruitment (years); N = number entering time interval; n = new cases diagnosed during year; C. inc. = cumulative incidence (%); CI = confidence interval; STDR = sight threatening diabetic retinopathy.
