# Supplementary material for: First Prospective Cohort Study of Diabetic Retinopathy from Sub-Saharan Africa: High Incidence and Progression of Retinopathy and Relationship to Human Immunodeficiency Virus Infection
Source: PubMed Central journal article supplement (PMC4994575; doi:10.1016/j.ophtha.2016.05.042), 2016-09
Supplement: mmc4.pdf [file mmc4.pdf]

**Online Appendix Table 4** Number of subjects listed for, started and completed a course of laser treatment during the course of the MDRS (December 2011 until May 2014) classified by grade of DR at the start of the study.

| Baseline level of retinopathy | n          | Laser photocoagulation<br>(listed/started/completed course) |                 |                 |
|-------------------------------|------------|-------------------------------------------------------------|-----------------|-----------------|
|                               |            | Scatter and macular                                         | Scatter alone   | Macular alone   |
| Level 10                      | 177        | 0                                                           | 0               | 1/0/0           |
| Level 20                      | 94         | 0/0/0                                                       | 1/1/0           | 12/11/11        |
| Level 30                      | 25         | 4/4/3                                                       | 4/4/4           | 7/7/7           |
| Level 40                      | 26         | 17/16/12                                                    | 3/3/3           | 2/2/2           |
| Level 50                      | 8          | 6/6/5                                                       | 2/2/2           | 0               |
| Level 60                      | 16         | 13/13/13                                                    | 3/2/2           | 0               |
| Level 70+                     | 10         | 8/8/7                                                       | 2/2/2           | 0               |
| 90                            | 1          | 0                                                           | 0               | 0               |
| <b>Total</b>                  | <b>357</b> | <b>48/47/40</b>                                             | <b>15/14/13</b> | <b>22/20/20</b> |
