# Supplementary material for: First Prospective Cohort Study of Diabetic Retinopathy from Sub-Saharan Africa: High Incidence and Progression of Retinopathy and Relationship to Human Immunodeficiency Virus Infection
Source: PubMed Central journal article supplement (PMC4994575; doi:10.1016/j.ophtha.2016.05.042), 2016-09
Supplement: mmc5.pdf [file mmc5.pdf]

## Online Appendix Figure 1 Levels of retinopathy and maculopathy in the Liverpool Diabetic Eye Study

| Level | Definition |
|-------|------------|
|-------|------------|

---

### Retinopathy

|    |                                                                                                                                                                              |
|----|------------------------------------------------------------------------------------------------------------------------------------------------------------------------------|
| 10 | No retinopathy                                                                                                                                                               |
| 20 | Hemorrhages or microaneurysms < ETDRS standard photograph 2A †                                                                                                               |
| 30 | Hemorrhages or microaneurysms ≥ ETDRS standard photograph 2A, and/or 1-6 cotton wool spots                                                                                   |
| 40 | Hemorrhages/ microaneurysms ≥ ETDRS standard photograph 2A<br>and/or ≥ 6 cotton wool spots<br>and/or 1 quadrant venous changes<br>and/or IRMA < ETDRS standard photograph 8A |
| 50 | IRMA ≥ ETDRS standard photograph 8A<br>and/or 2 or more quadrants venous changes<br>and/or pre-retinal hemorrhage in absence of proliferation                                |
| 60 | Fibrovascular proliferation<br>and/or proliferative retinopathy                                                                                                              |
| 70 | Diabetic Retinopathy Study high risk characteristics                                                                                                                         |
| 71 | Tractional retinal detachment                                                                                                                                                |
| 72 | No fundal view due to vitreous blood                                                                                                                                         |
| 90 | Ungradeable due to any other reason e.g. media opacity                                                                                                                       |

---

### Maculopathy

|   |                                                                                                         |
|---|---------------------------------------------------------------------------------------------------------|
| 0 | No maculopathy                                                                                          |
| 1 | Questionable: < 50% certainty of presence of exudate                                                    |
| 2 | Exudate >1 disc diameter from fixation                                                                  |
| 3 | Circinate ring of exudate within macula >1 disc area in size but not within 1 disc diameter of fixation |
| 4 | Exudates within 1 disc diameter of fixation<br>and/or presence of clinically significant macular edema  |

8 Exudates due to other diseases e.g. vein occlusion, choroidal neovascularisation

90 Ungradeable

---

† Definition of any diabetic retinopathy:  $\geq 1$  haemorrhage or microaneurysm in either eye. Flame shaped hemorrhages associated with hypertension are discounted. IRMA = intraretinal microvascular abnormalities. ETDRS = Early Treatment Diabetic Retinopathy Study.

Regression of retinopathy: retinopathy graded according to the lesions present. If new vessels have regressed completely after treatment the grader grades the lesions which remain. Peripheral scatter laser scars do not, in themselves, constitute proliferative retinopathy.
